# Supplementary figures and images for: Oestrogen receptors β1 and βcx have divergent roles in breast cancer survival and lymph node metastasis
Source: PubMed Central journal article supplement — Br J Cancer. 2014 Jul 15;111(5):918–26. doi: 10.1038/bjc.2014.398 (PMC4150283; doi:10.1038/bjc.2014.398), 2014-07-15

Supplementary figure 1

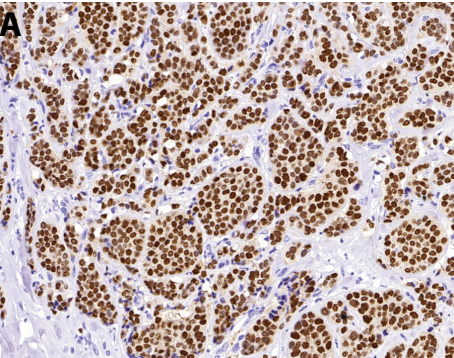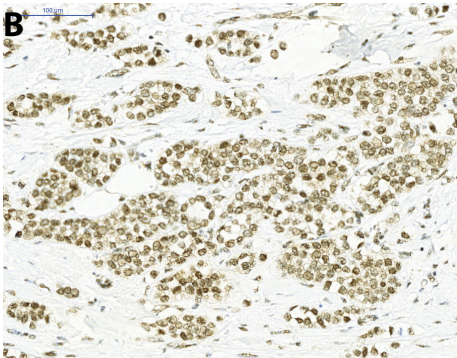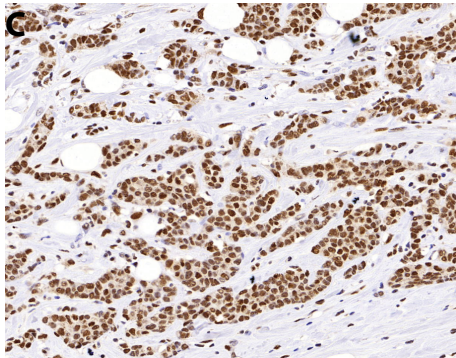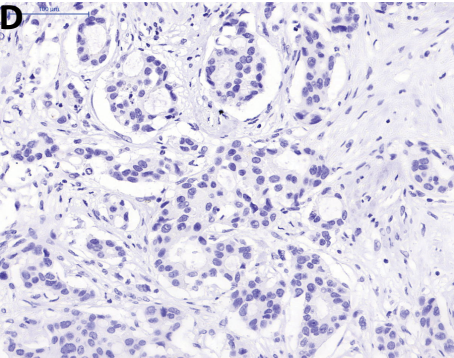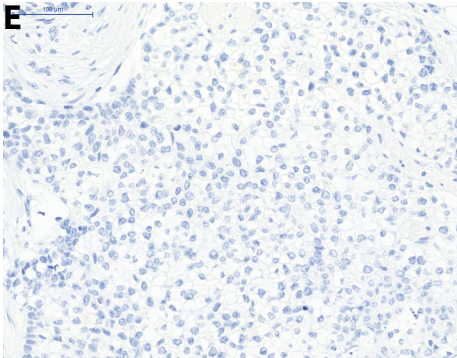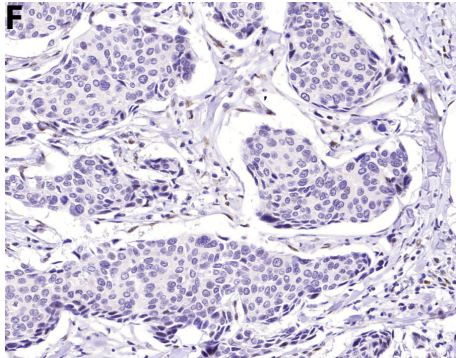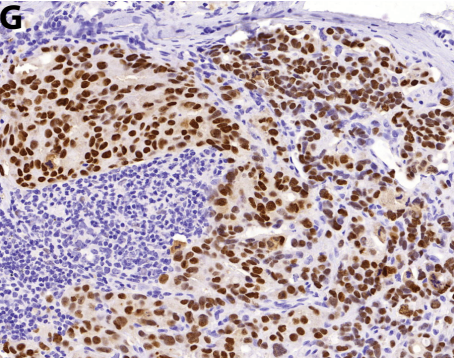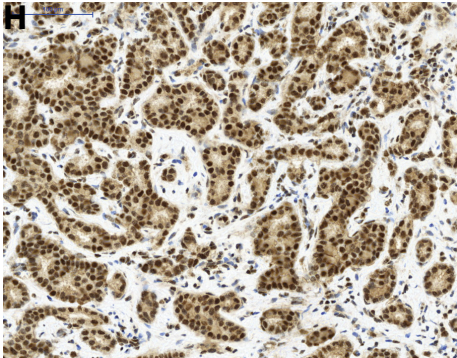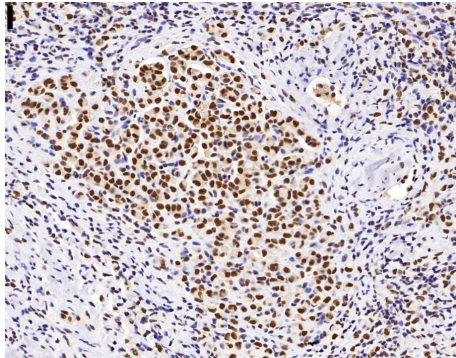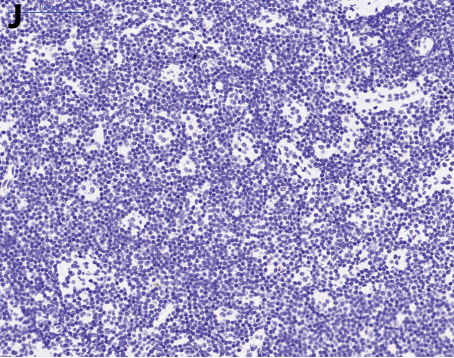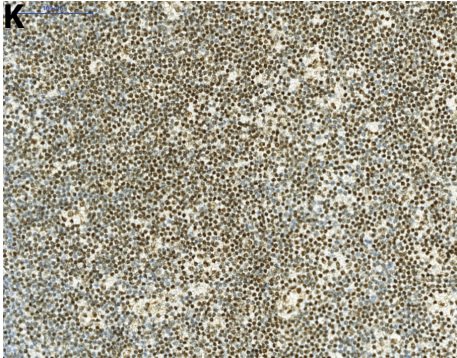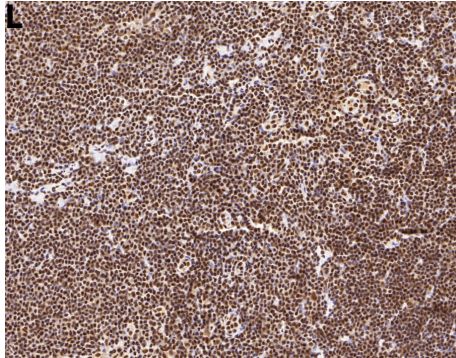

Supplement: bjc2014398x2.pdf [file bjc2014398x2.pdf]
